# Supplementary material for: MABEL photon-counting laser altimetry data in Alaska for ICESat-2simulations and development
Source: Copernicus journal article supplement (doi:10.5194/tc-10-1707-2016), 2016-08-10
Supplement: Supplementary file 1 [file tc-10-1707-2016-supplement.zip]

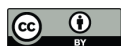

## *Supplement of*

# **MABEL photon-counting laser altimetry data in Alaska for ICESat-2 simulations and development**

**Kelly M. Brunt et al.**

*Correspondence to:* Kelly M. Brunt ([kelly.m.brunt@nasa.gov](mailto:kelly.m.brunt@nasa.gov))

- [tc-10-1707-2016-supplement-title-page.pdf](#)
- [JuneauIcefieldGPSdata.pdf](#)
- [LowerTakuGlacierVelocityData.pdf](#)

The copyright of individual parts of the supplement might differ from the CC-BY 3.0 licence.
