# Supplementary material for: MABEL photon-counting laser altimetry data in Alaska for ICESat-2simulations and development
Source: Copernicus journal article supplement (doi:10.5194/tc-10-1707-2016), 2016-08-10
Supplement: Supplementary file 2 [file tc-10-1707-2016-supplement.zip]

# Juneau Icefield GPS Data

From 'MABEL photon-counting laser altimetry data in Alaska for ICESat-2 simulations and development  
Brunt, Neumann, Amundson, Kavanaugh, Moussavi, Walsh, Cook, & Markus  
kelly.m.brunt@nasa.gov

Point ID, Easting, Northing, Ellipsoid Height (Global), GNSS Vector Observation. End Time, GNSS Vector Observation.H. Precision (m), GNSS Vector Observation.V. Precision (m)

5-A, 545233.118, 6500393.568, 1118.790, 7/19/14 13:08, 0.007, 0.007  
5-B, 545229.798, 6500389.873, 1118.794, 7/19/14 13:18, 0.005, 0.006  
5-C, 545234.612, 6500388.729, 1118.678, 7/19/14 13:38, 0.007, 0.008  
10-A, 545233.665, 6500396.284, 1118.784, 7/19/14 13:07, 0.007, 0.007  
10-B, 545226.824, 6500389.025, 1118.818, 7/19/14 13:22, 0.006, 0.006  
10-C, 545236.775, 6500386.652, 1118.618, 7/19/14 13:40, 0.005, 0.006  
25-A, 545235.683, 6500404.665, 1118.870, 7/19/14 13:06, 0.006, 0.005  
25-B, 545218.632, 6500386.386, 1118.919, 7/19/14 13:24, 0.005, 0.005  
25-C, 545243.111, 6500380.692, 1118.586, 7/19/14 13:43, 0.007, 0.008  
50-A, 545238.935, 6500418.808, 1118.994, 7/19/14 13:04, 0.006, 0.005  
50-B, 545204.915, 6500382.126, 1118.825, 7/19/14 13:27, 0.006, 0.007  
50-C, 545253.518, 6500371.135, 1118.565, 7/19/14 13:46, 0.006, 0.007  
75-A, 545242.199, 6500432.861, 1118.987, 7/19/14 13:02, 0.012, 0.009  
75-B, 545191.116, 6500377.908, 1118.971, 7/19/14 13:28, 0.005, 0.006  
75-C, 545264.220, 6500361.010, 1118.341, 7/19/14 13:47, 0.005, 0.007  
90-A, 545244.293, 6500441.324, 1119.110, 7/19/14 13:00, 0.008, 0.007  
90-B, 545182.800, 6500375.415, 1119.005, 7/19/14 13:30, 0.006, 0.005  
90-C, 545270.532, 6500355.306, 1118.178, 7/19/14 13:50, 0.006, 0.008  
125-A, 545248.669, 6500461.033, 1119.407, 7/19/14 12:57, 0.007, 0.005  
125-B, 545163.534, 6500369.456, 1118.936, 7/19/14 13:32, 0.006, 0.006  
125-C, 545285.416, 6500341.455, 1118.123, 7/19/14 13:52, 0.005, 0.008  
150-A, 545251.929, 6500475.072, 1119.481, 7/19/14 12:55, 0.007, 0.006  
150-B, 545149.747, 6500365.272, 1118.820, 7/19/14 13:34, 0.005, 0.007  
150-C, 545295.795, 6500331.545, 1117.955, 7/19/14 13:54, 0.005, 0.006

Reference Station: FFGR 19.1 (Scott, 546006.592, 6501023.962, 1189.740)

All coordinates are with respect to the WGS84 datum and UTM Zone 8 North

Heights represent the surface of the glacier and are with respect to the WGS84 ellipsoid

"Date and time is the time of the surveys, in local time, which was Alaska Daylight Saving time (UTC -8)"

Points were surveyed with Trimble 5700 base and rover receivers operating in real-time differential mode. Base receiver was located at FFGR 19.1 at Camp 10

"Survey was conducted by Scott McGee (Chief Surveyor) and Ya' Shonti Bridgers (student), Foundation for Glacier and Environmental Research Program/Juneau Icefield Research Program"
