# Supplementary material for: MABEL photon-counting laser altimetry data in Alaska for ICESat-2simulations and development
Source: Copernicus journal article supplement (doi:10.5194/tc-10-1707-2016), 2016-08-10
Supplement: Supplementary file 3 [file tc-10-1707-2016-supplement.zip]

# Lower Taku Glacier Velocity Data

From 'MABEL photon-counting laser altimetry data in Alaska for ICESat-2 simulations and development  
Brunt, Neumann, Amundson, Kavanaugh, Moussavi, Walsh, Cook, & Markus  
kelly.m.brunt@nasa.gov

| GPS_site | install_date | days_installed | northing_velocity | easting_velocity | latitude      | longitude     | WGS84_elev_m  |
|----------|--------------|----------------|-------------------|------------------|---------------|---------------|---------------|
| C1       | 2014-06-06   | 40             | -0.366254194838   | 0.676946930948   | 58.4368467405 | 225.954523392 | 240.159136163 |
| C2       | 2014-06-06   | 40             | -0.71658911314    | 0.637982350712   | 58.4467255822 | 225.928497945 | 325.338756753 |
| SDWN     | 2014-06-06   | 40             | -0.16723283788    | 0.095066552897   | 58.4201155154 | 225.963551054 | 143.015900868 |
| SLFT     | 2014-06-06   | 40             | -0.300902271012   | 0.663761584494   | 58.4420237577 | 225.953570073 | 251.806445521 |
| SRIT     | 2014-06-06   | 40             | -0.924528385548   | 0.539579920067   | 58.4456871866 | 225.917992275 | 338.375314028 |
| SUP      | 2014-06-06   | 40             | -0.849319509396   | 0.410940854669   | 58.4523874889 | 225.926090342 | 339.958668819 |
